# Supplementary material for: Ultrasensitive detection of cancer cells and glycan expression profiling based on a multivalent recognition and alkaline phosphatase-responsive electrogenerated chemiluminescence biosensor
Source: Royal Society of Chemistry journal article supplement (doi:10.1039/c4nr03053b), 2014-01-01
Supplement: c4nr03053b1.pdf [file c4nr03053b1.pdf]

---Electronic Supplementary Information---

**Ultrasensitive Detection of Cancer Cell and Glycan  
Expression Profiling Based on Multivalent Recognition and  
Alkaline Phosphatase-Responsive Electrogenerated  
Chemiluminescence Biosensor**

Xiaojiao Chen<sup>a, b</sup>, Yao He<sup>a</sup>, Youyu Zhang<sup>b\*</sup>, Meiling Liu<sup>b</sup>, Yang Liu<sup>a\*</sup> and Jinghong  
Li<sup>a</sup>

<sup>a</sup>Department of Chemistry, Beijing Key Laboratory for Analytical Methods and  
Instrumentation, Tsinghua University, Beijing 100084, China.

<sup>b</sup>Key Laboratory of Chemical Biology and Traditional Chinese Medicine Research (Ministry  
of Education), College of Chemistry and Chemical Engineering, Hunan Normal University,  
Changsha 410081, China

E-mail: liu-yang@mail.tsinghua.edu.cn; zhangyy@hunnu.edu.cn

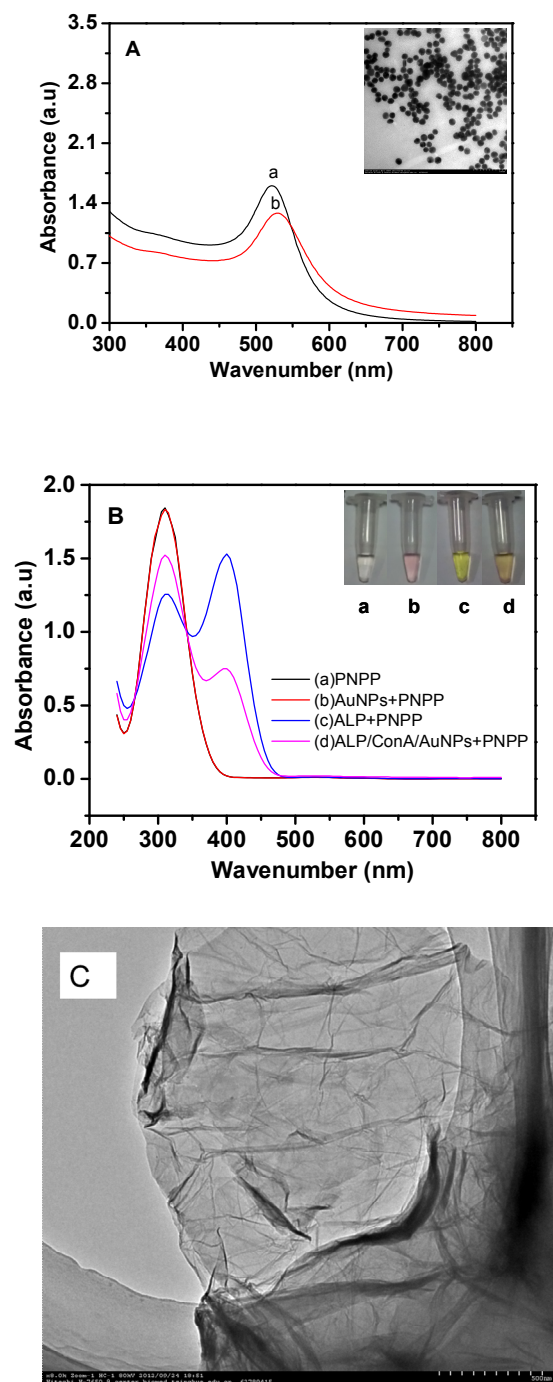

**Fig. S1** (A) UV-vis spectra of Au NPs (a) and ALP-Con A-Au NPs conjugates (b). Inset exhibits the TEM picture of the ALP-Con A-Au NPs nanoprobe. (B) UV spectral of ALP-Con A-Au NPs probe activity analysis in 50 mM Tris-HCl solution (containing 5 mM PNPP, 2 mM MgCl<sub>2</sub>, 1 mM ZnCl<sub>2</sub>, pH 9.0). The inset shows the picture of the ALP substrate PNPP (a), Au NPs and PNPP (b), ALP and PNPP (c) and ALP-Con A-Au NPs with PNPP (d). (C) The TEM pattern of the PAMAM conjugated chemically reduced graphene oxide.

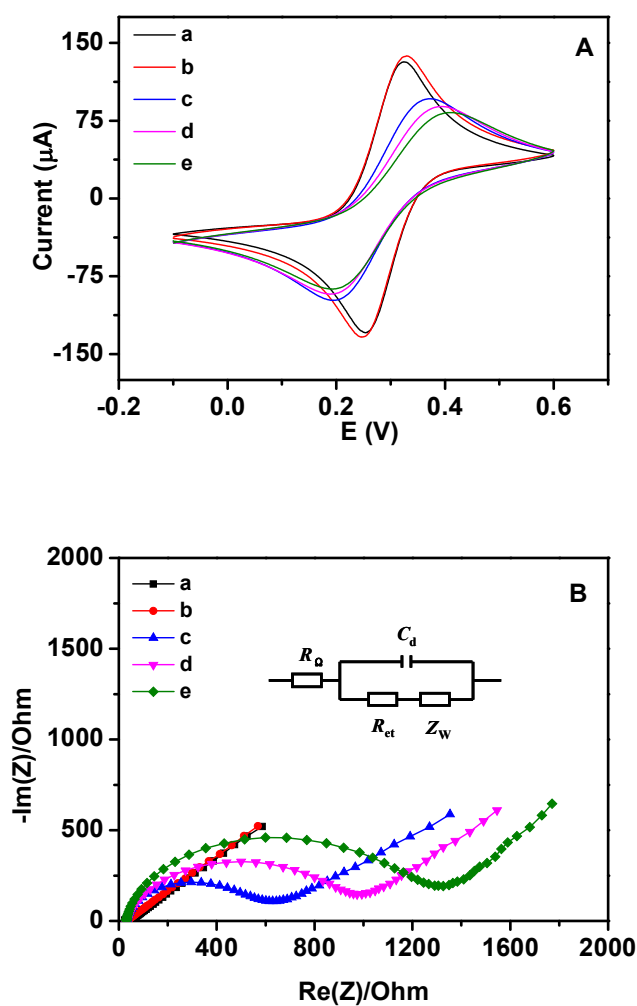

**Fig. S2** Cyclic voltammograms (A) and electrochemical impedance spectra (B) spectra of (a) bare GCE, (b) rGO-DEN/GCE, (c) aptamer/rGO-DEN/GCE, (d) CCRF-CEM cell/aptamer/rGO-DEN/GCE, and (e) ALP-Con A-Au NPs/CCRF-CEM cell/aptamer/rGO-DEN/GCE in 0.5 M KCl solution with 5 mM  $[\text{Fe}(\text{CN})_6]^{4-/3-}$ , respectively. Scan rate is 100 mV/s.

| <b>Lectins</b> | <b>Origin</b>               | <b>Binding Specificity</b>                                       |
|----------------|-----------------------------|------------------------------------------------------------------|
| Con A          | <i>Canavalia ensiformis</i> | Terminal $\alpha$ Man, Man $\alpha$ 3[Man $\alpha$ 6] Man        |
| WGA            | <i>Triticum unlgari</i>     | (Neu5Ac) (Gal $\beta$ 4GlcNAc)1-3,4(GlcNAc $\beta$ 4GlcNAc)1-3,4 |
| PNA            | <i>Arachis hypogaea</i>     | Gal $\beta$ (1,3) GalNAc, Terminal $\beta$ Gal                   |

Neu5Ac: N-acetylneuraminic acid. Gal: galactose. GlcNAc: N-acetylglucosamine.  
Man: mannose. GalNAc:N-acetylgalactosamine.

**Table S1** Glycan-Binding Specificities of the Lectins used for for cell determination.
